# Supplementary material for: Early Survival Prediction Framework in CD19-Specific CAR-T Cell Immunotherapy Using a Quantitative Systems Pharmacology Model
Source: MDPI journal article supplement (doi:10.3390/cancers13112782), 2021-06-03
Supplement: s1 [file s1]

# Supplementary Metrials: Early response prediction framework in CD19-specific CAR-T cell immunotherapy using a quantitative systems pharmacology model

Anna Mueller-Schoell, Nahum Puebla-Osorio, Robin Michelet, Michael Green, Annette Künkele, Wilhelm Huisinga, Paolo Strati, Beth Chasen, Sattva S. Neelapu, Cassian Yee and Charlotte Kloft

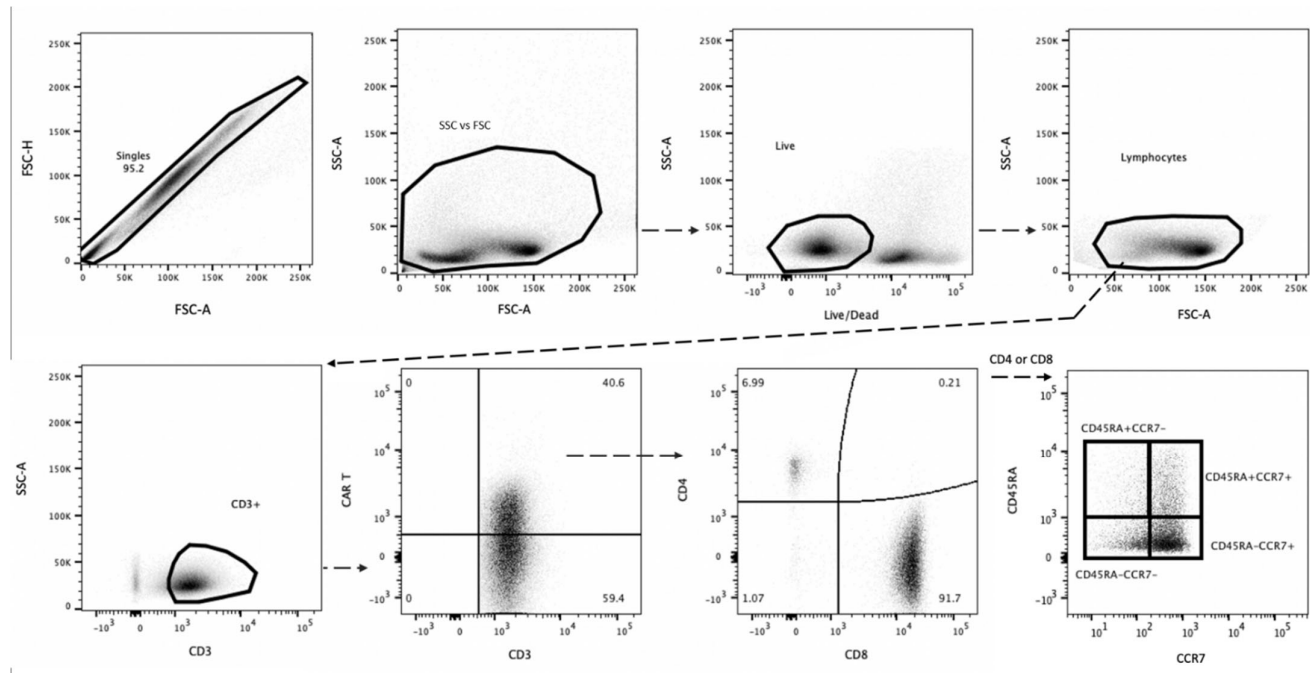

**Figure S1.** Flow cytometry gating strategy for the isolation of CD4<sup>+</sup> and CD8<sup>+</sup> CAR-T cells from peripheral blood samples of patients at days 7, 14 and 28 after infusion and identification of the different phenotypes. *Abbreviations:* SSC: sideward scatter; FSC: forward scatter; CAR T: chimeric antigen receptor T cells.

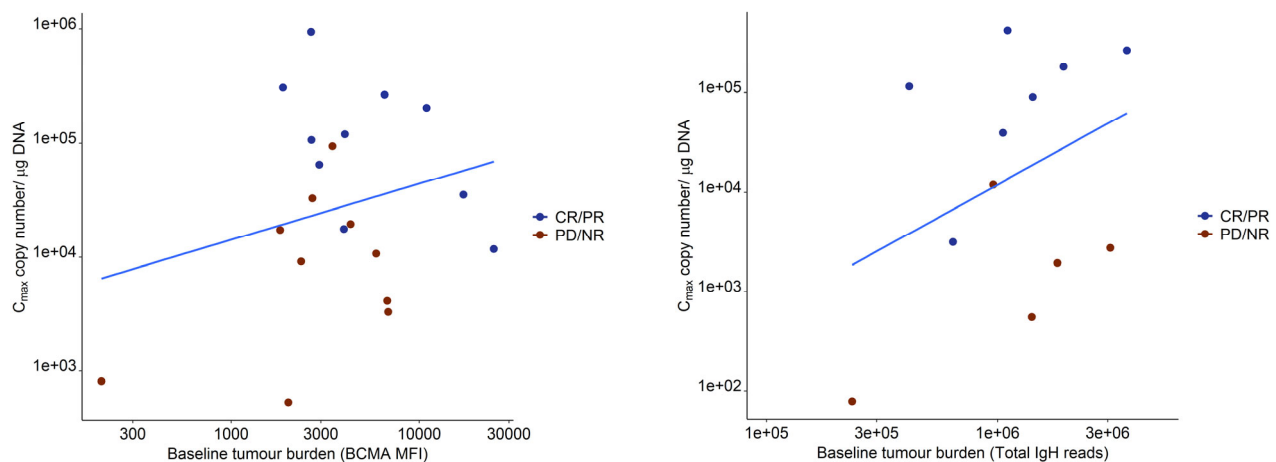

**Figure S2.** Digitised data on C<sub>max</sub> and Baseline tumour burden in patients with MM and CLL. **Right:** MM data; **Left:** CLL data; both digitised from the publication by Liu et al. *Abbreviations:* CLL: chronic lymphocytic leukaemia; CR: complete response; MM: multiple myeloma; NR: no response; PR: partial response.

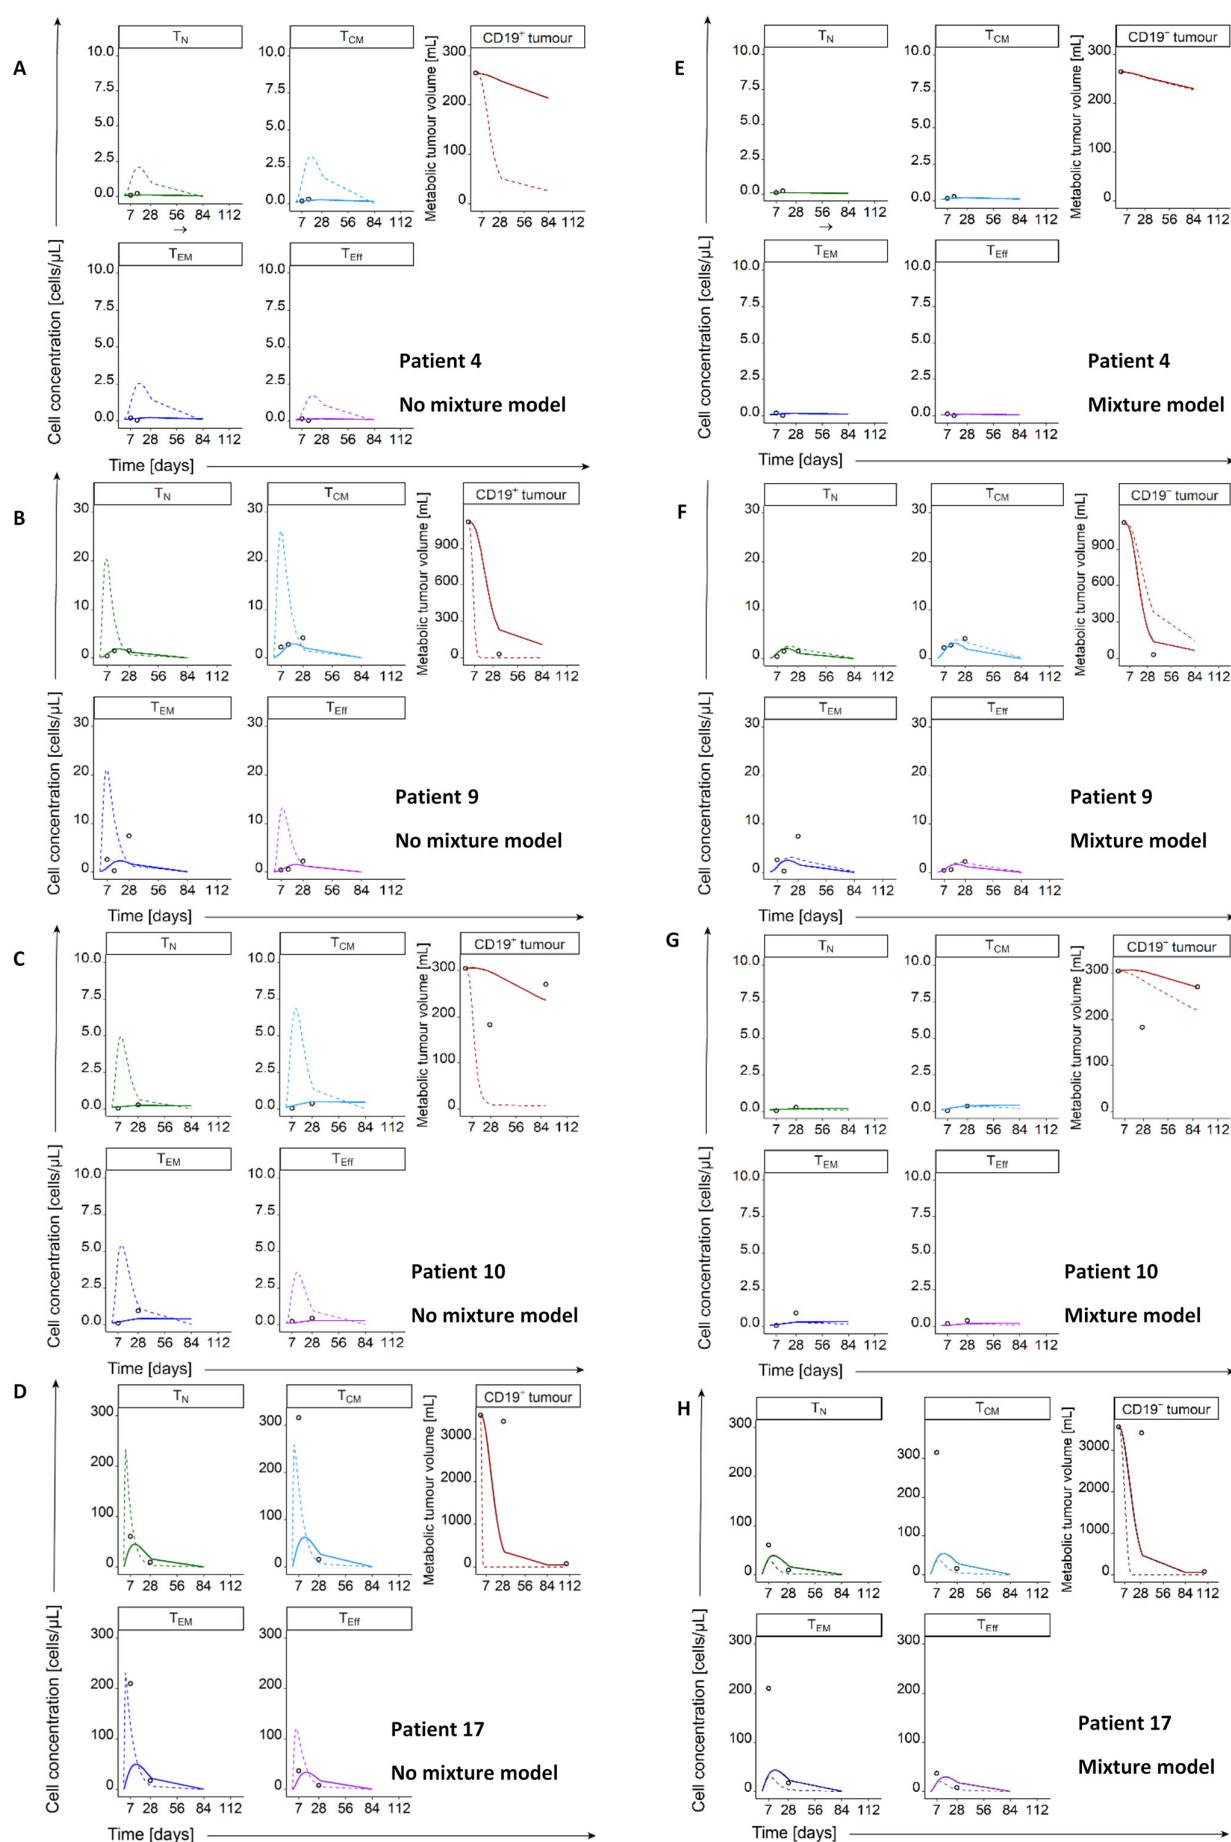

**Figure S3.** Measured concentrations and simulated typical and individual model predictions of different species after CART-cell infusion for patients in the low expansion subpopulation before and after implementation of the mixture model. *Data points:* measured concentrations. *Dashed lines:* simulated typical model predictions. *Solid lines:* individual model predictions. Panels (A)–(D) show individual plots using the original model and panels (E)–(H) show individual plots using the mixture model. Abbreviations: T<sub>N</sub>: Naïve T cells, T<sub>CM</sub>: central memory T cells, T<sub>EM</sub>: effector memory T cells, T<sub>Eff</sub>: Effector T cells, CD19<sup>+</sup> tumour: CD19<sup>+</sup> metabolic tumour volume.

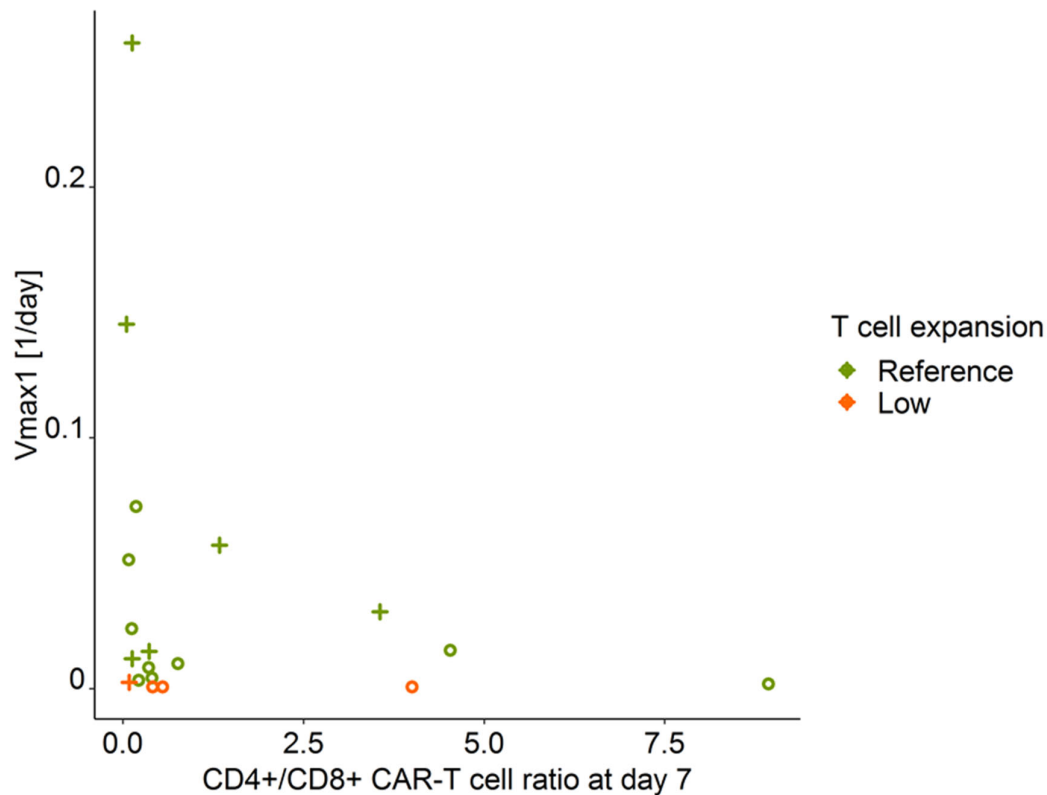

**Figure S4.** Estimated maximum expansion capacity upon tumor contact parameter  $V_{max1}$  versus the CD4/CD8 CAR-T cell ratio at day seven. Circles: no previous autologous stem cell transplantation, plus signs: previous autologous stem cell transplantation.

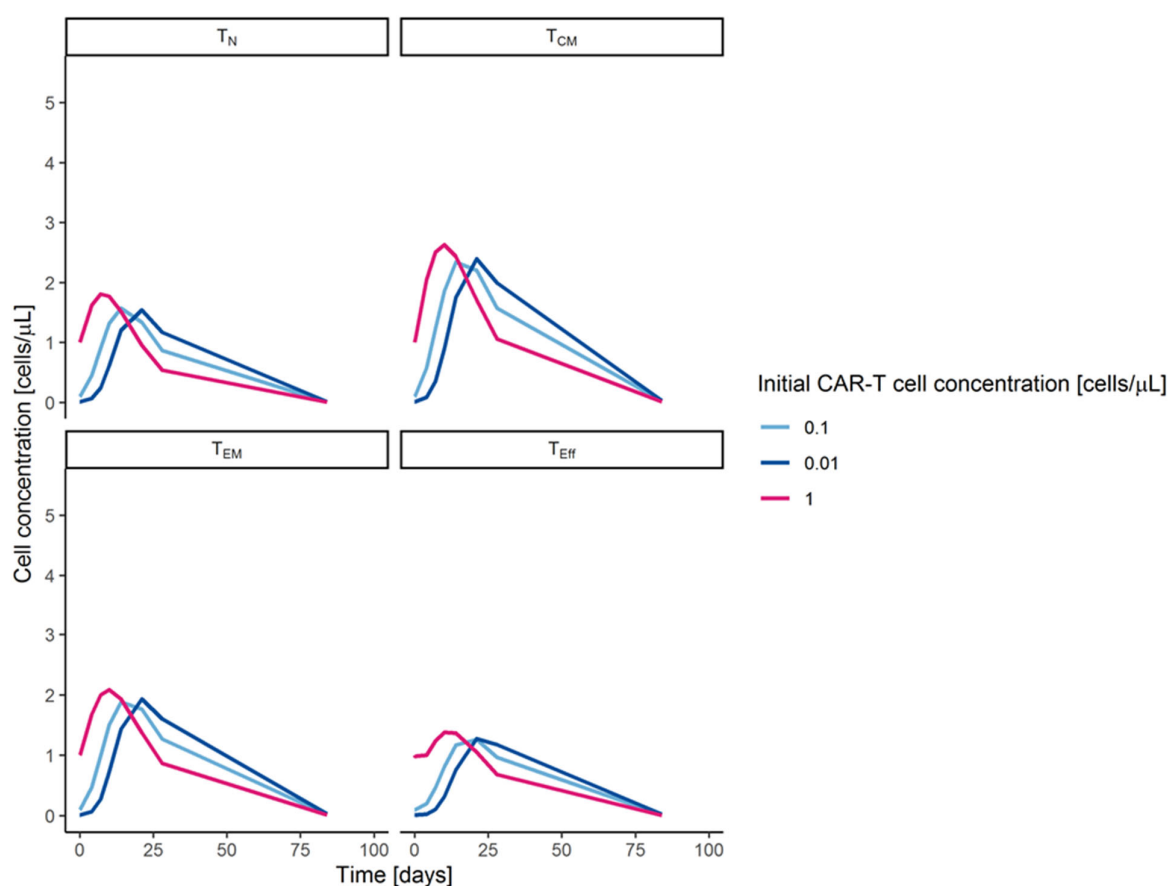

**Figure S5.** Simulated typical CAR-T cell concentration-time profiles using different initial CAR-T cell concentrations (0.1 cells  $\mu$ L $^{-1}$  as used in our model (light blue) and ten-fold lower (dark blue) or ten-fold higher (purple) and a baseline metabolic tumour volume of 85.7 mL (median baseline metabolic tumour volume in our dataset) (assuming reference covariate values of no previous autologous stem cell transplantation and a CD4/CD8 CAR-T cell ratio of 1).

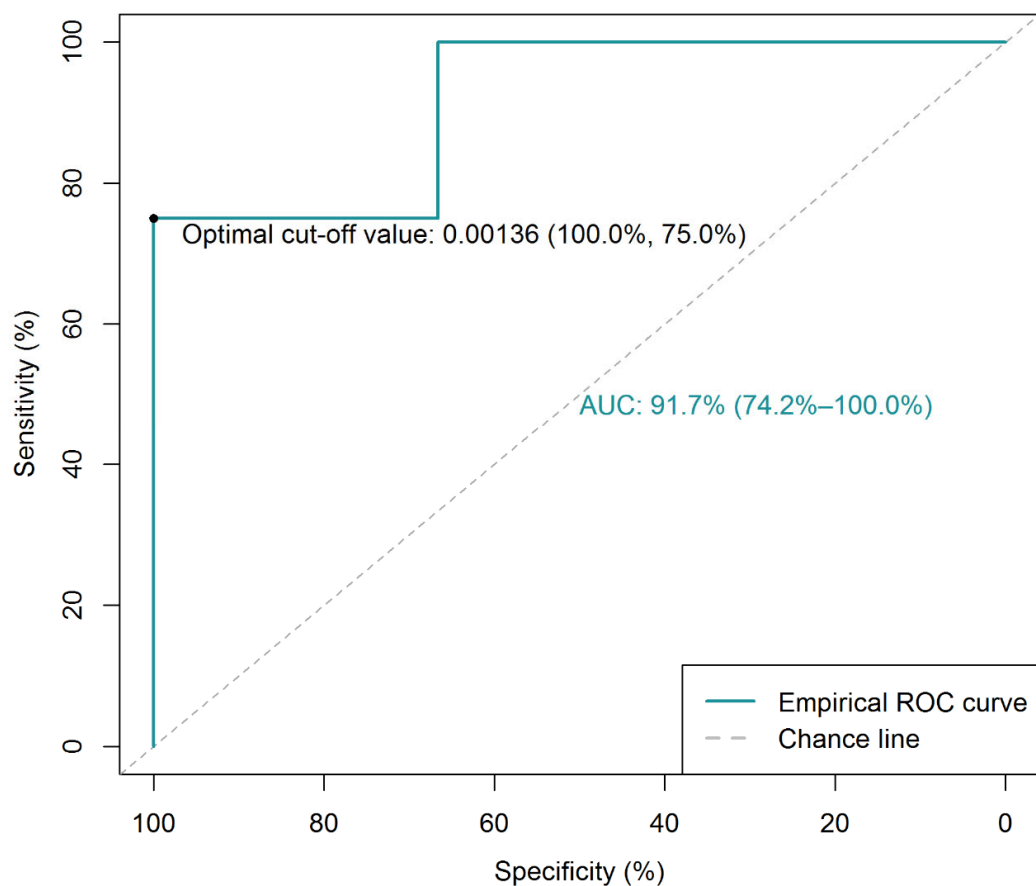

**Figure S6.** Receiver operating characteristic (ROC) curve for deriving an optimal cut-off value of the clinical composite score (CCS) Maximum CAR-T<sub>N</sub> cell concentrations ( $C_{\max}$ )/Baseline metabolic tumour volume [(cells ·  $\mu\text{L}^{-1}$ ) ·  $\text{mL}^{-1}$ ] to determine if patients belong to low expansion subpopulation. The optimal cut-off value marks the value with optimal predictive capability (0.0143 [(cells ·  $\mu\text{L}^{-1}$ ) ·  $\text{mL}^{-1}$ ]; with 75% sensitivity, 100% specificity and an area under the curve of 91.7% (95% confidence interval: 74.2%–100%).

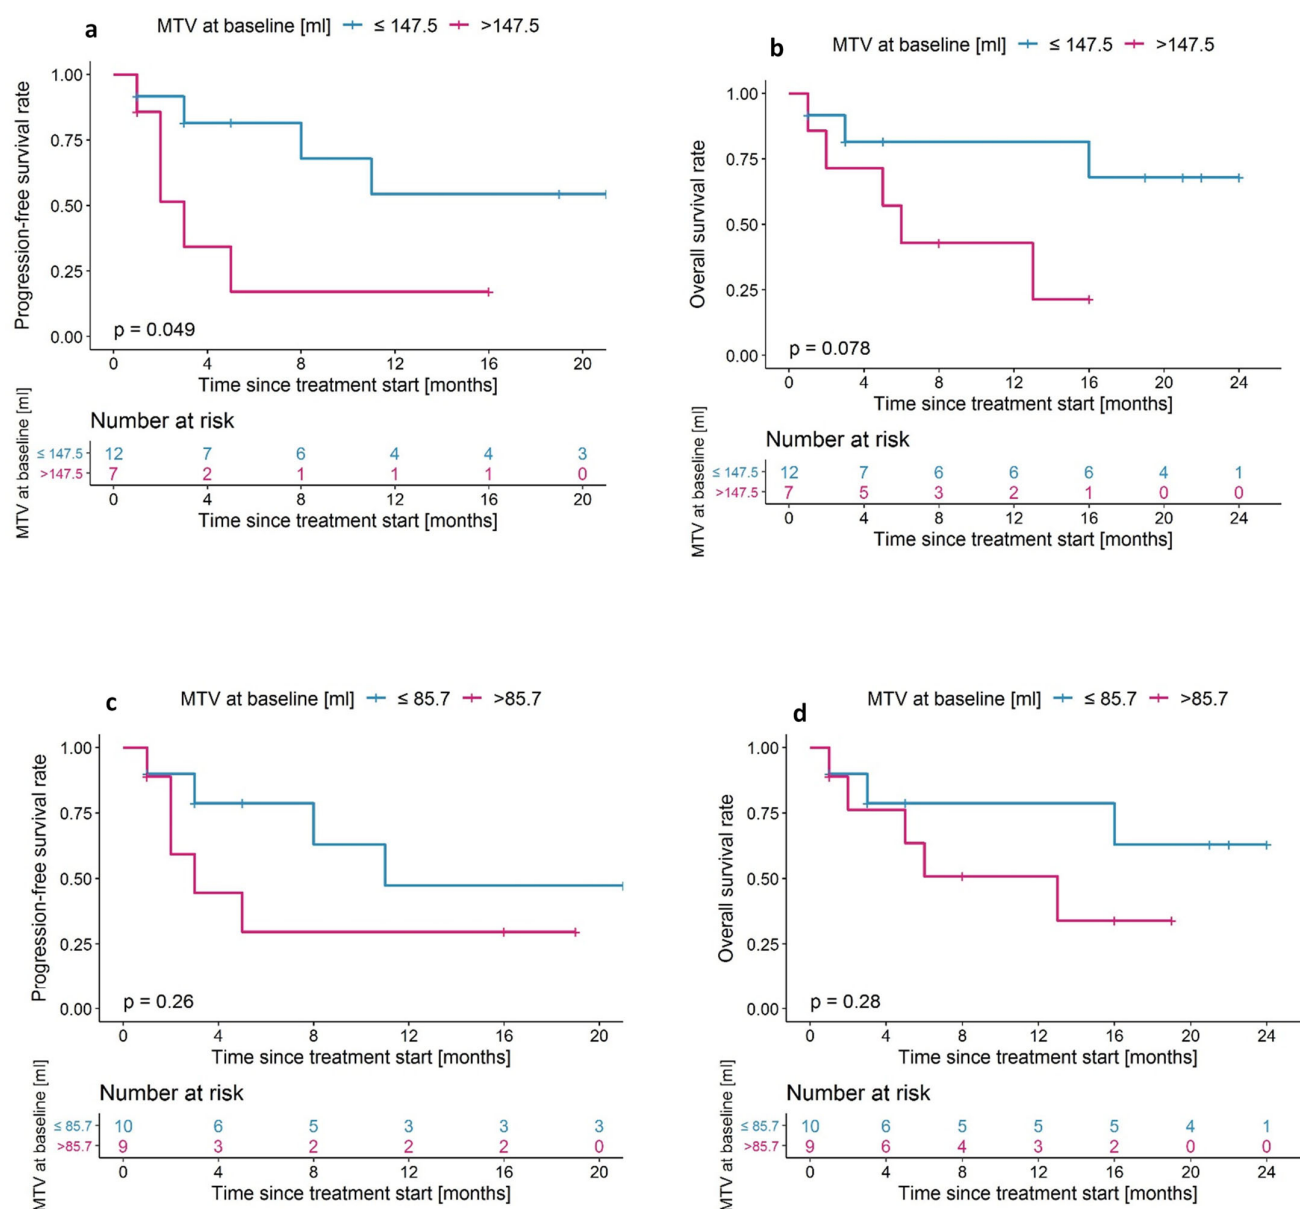

**Figure S7.** Kaplan-Meier plots for progression-free survival and overall survival in patients with high and low metabolic tumor volume in mL at baseline. In plots (a) and (b), the cut-off value of 147.5 mL has been used while in plots (c) and (d), the median baseline metabolic tumour volume in our dataset has been used as cut-off value; log-rank tests.

Abbreviations: MTV: metabolic tumour volume.

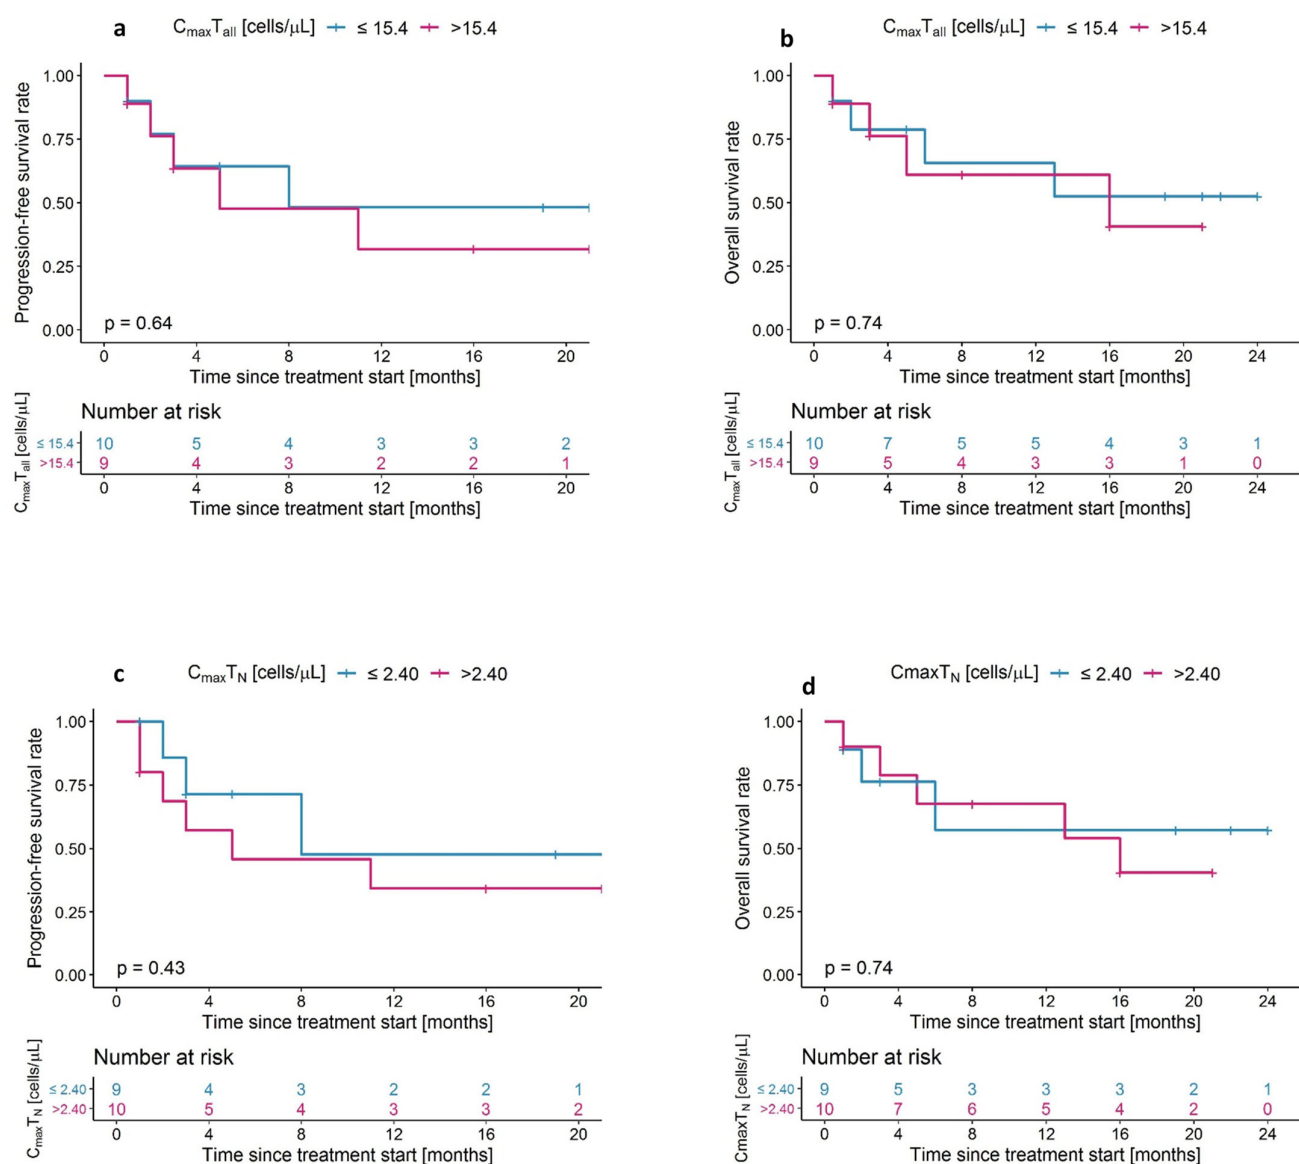

**Figure S8.** Kaplan-Meier plots for progression-free survival and overall survival in patients with high (above median) and low (lower or equal to median) maximum CAR-T cell concentrations. In plots (a) and (b), all CAR-T cells are assessed, while in plots (c) and (d), only naïve T cells are assessed, as the maximum concentration of naïve T cells was highest correlated with our model parameter  $V_{\max 1}$ ; log-rank tests. Abbreviations:  $C_{\max}$ : maximum concentration;  $T_{\text{all}}$ : the sum of all measured CAR-T cell phenotypes;  $T_N$ : naïve CAR-T cells.

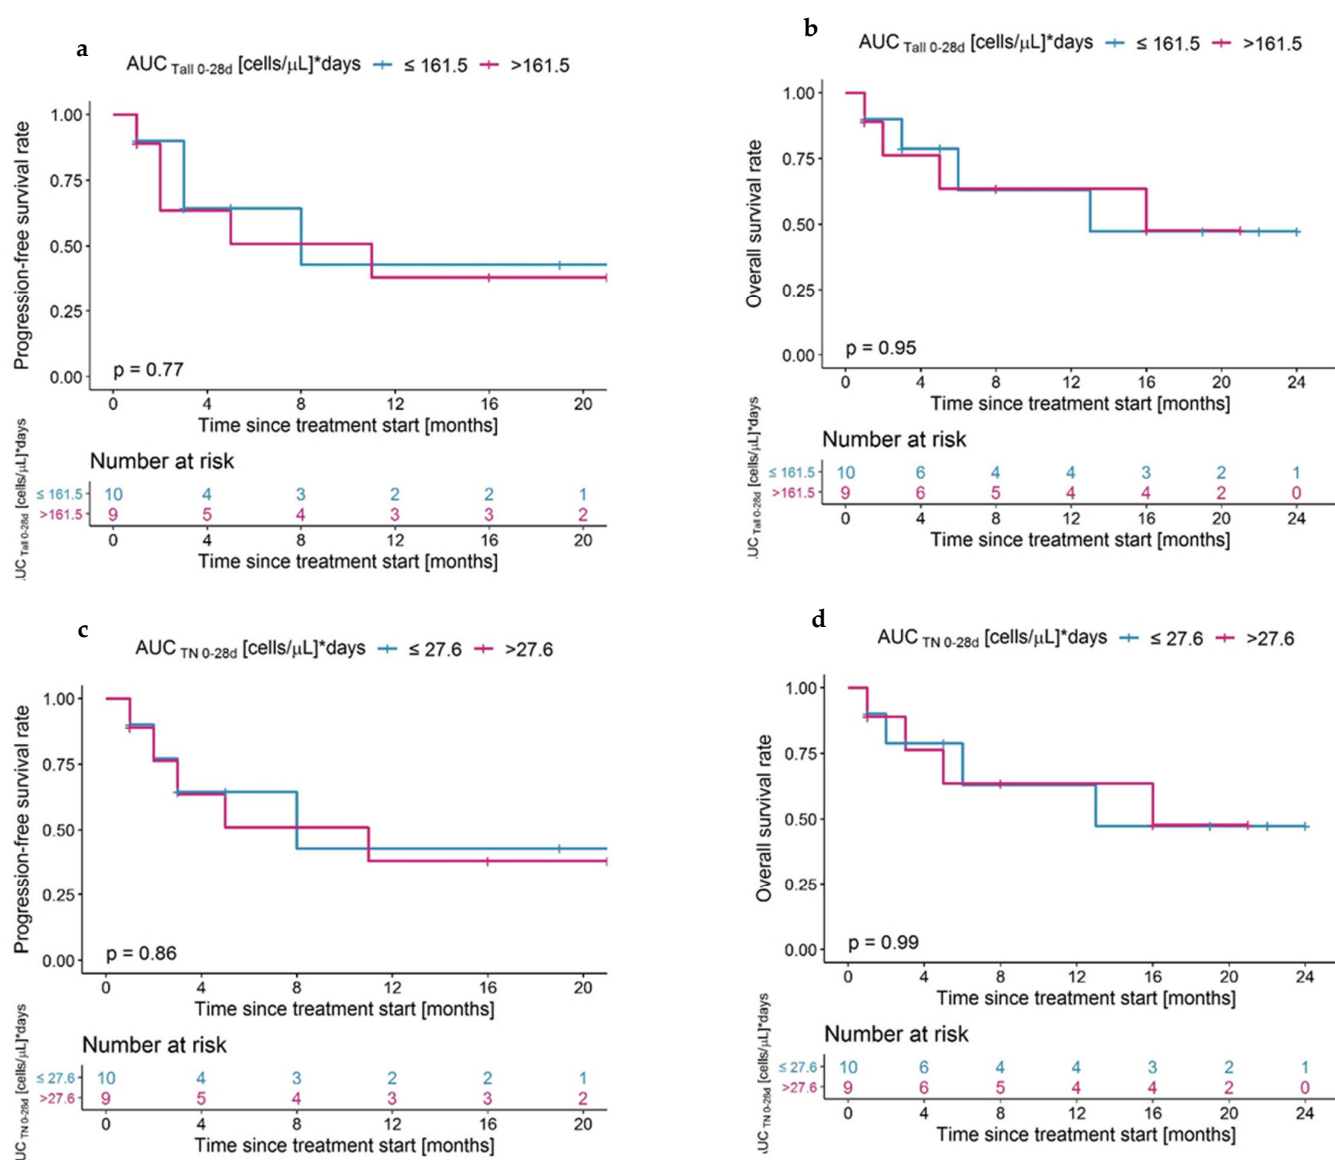

**Figure S9.** Kaplan-Meier plots for progression-free survival and overall survival in patients with high (above median) and low (lower or equal to median)  $AUC_{0-28d}$  CAR-T cell concentrations. In plots (a) and (b), all CAR-T cells are assessed, while in plots (c) and (d), only naïve T cells are assessed, as the maximum concentration of naïve T cells was highest correlated with our model parameter  $V_{max1}$ ; log-rank tests. *Abbreviations:*  $AUC_{0-28d}$ : area under the concentration-time curve from day 0 to day 28;  $T_{all}$ : the sum of all measured CAR-T cell phenotypes;  $T_N$ : naïve CAR-T cells.

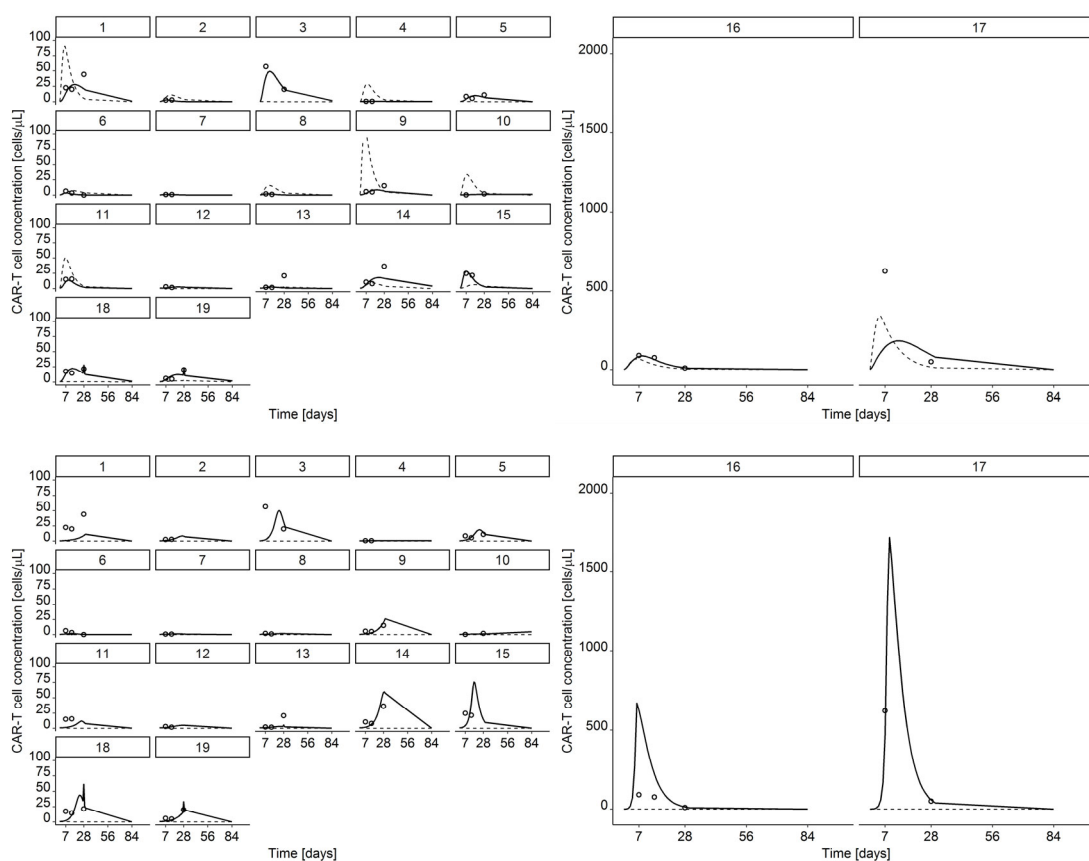

**Figure S10.** Measured CAR-T cell concentrations (circles) and individual (solid lines) and typical (dashed lines) model predictions using the base model (without covariates or mixture model) and using either the respective CAR-T cell population (**upper plots**) or the CD19<sup>+</sup> metabolic tumour volume (**lower plots**) in the denominator of the expansion term describing CAR-T cell expansion in response to tumour contact. The base model using the respective CAR-T cell population in the denominator of the expansion term (**upper plots**) was used for the rest of the work.

Table S1. Patient characteristics.

| Pat. ID | Disease Type | Sex [M/F] | Age group [years] | C <sub>max</sub> naïve CAR-T cells [cells·μL <sup>-1</sup> ] | Baseline metabolic tumour volume [mL] | Clinical composite score <sub>TN</sub> * [(cells·μL <sup>-1</sup> )·mL <sup>-1</sup> ] | Low expansion subpopulation [yes/no] | Previous ASCT [yes/no] | CD4/CD8 ratio of CAR-T cells at day seven | Progressive disease [yes/no] | PFS [months] | OS [months] | Dead [yes/no] (and reason) or lost to follow-up† |
|---------|--------------|-----------|-------------------|--------------------------------------------------------------|---------------------------------------|----------------------------------------------------------------------------------------|--------------------------------------|------------------------|-------------------------------------------|------------------------------|--------------|-------------|--------------------------------------------------|
| 1       | DLBCL        | F         | 51-60             | 44.1                                                         | 894                                   | 0.00542                                                                                | No                                   | No                     | 8.94                                      | Yes                          | 2            | 8           | Lost to follow-up                                |
| 2       | DLBCL        | M         | 21-30             | 3.04                                                         | 102                                   | 0.00863                                                                                | No                                   | No                     | 0.357                                     | No                           | 1            | 1           | Lost to follow-up                                |
| 3       | PMBCL        | M         | 51-60             | 56.8                                                         | 13.0                                  | 0.723                                                                                  | No                                   | Yes                    | 0.126                                     | No                           | 21           | 21          | No                                               |
| 4       | TFL          | F         | 21-30             | 0.64                                                         | 264                                   | 0.000870                                                                               | Yes                                  | No                     | 4.01                                      | No                           | 1            | 1           | Yes (septic shock)                               |
| 5       | DLBCL        | F         | 51-60             | 11.0                                                         | 14.2                                  | 0.169                                                                                  | No                                   | Yes                    | 1.34                                      | No                           | 21           | 21          | No                                               |
| 6       | TFL          | M         | 31-40             | 6.43                                                         | 70.5                                  | 0.0174                                                                                 | No                                   | Yes                    | 0.364                                     | Yes                          | 8            | 24          | No                                               |
| 7       | DLBCL        | F         | 61-70             | 1.02                                                         | 13.1                                  | 0.0236                                                                                 | No                                   | Yes                    | 3.56                                      | No                           | 22           | 22          | No                                               |
| 8       | PMBCL        | M         | 71-80             | 2.04                                                         | 142                                   | 0.00230                                                                                | No                                   | No                     | 0.405                                     | No                           | 19           | 19          | No                                               |
| 9       | PMBCL        | M         | 51-60             | 15.3                                                         | 1118                                  | 0.00136                                                                                | Yes                                  | No                     | 0.413                                     | Yes                          | 2            | 2           | Yes (PD)                                         |
| 10      | DLBCL        | M         | 51-60             | 1.98                                                         | 305                                   | 0.000884                                                                               | Yes                                  | No                     | 0.549                                     | Yes                          | 3            | 6           | Yes (PD)                                         |
| 11      | DLBCL        | M         | 61-70             | 15.4                                                         | 479                                   | 0.00751                                                                                | No                                   | No                     | 0.223                                     | Yes                          | 1            | 13          | Yes (PD)                                         |
| 12      | DLBCL        | F         | 61-70             | 2.82                                                         | 2.54                                  | 0.299                                                                                  | No                                   | Yes                    | 0.0512                                    | No                           | 5            | 5           | Lost to follow-up                                |
| 13      | DLBCL        | M         | 51-60             | 16.8                                                         | 34.2                                  | 0.014                                                                                  | No                                   | No                     | 4.53                                      | No                           | 3            | 3           | Lost to follow-up                                |
| 14      | PMBCL        | M         | 61-70             | 36.2                                                         | 85.7                                  | 0.0705                                                                                 | No                                   | Yes                    | 0.130                                     | No                           | 1            | 1           | Lost to follow-up                                |
| 15      | DLBCL        | M         | 61-70             | 24.7                                                         | 64.1                                  | 0.164                                                                                  | No                                   | No                     | 0.0845                                    | Yes                          | 3            | 3           | Yes (PD)                                         |
| 16      | PMBCL        | F         | 61-70             | 90.8                                                         | 663                                   | 0.0388                                                                                 | No                                   | No                     | 0.764                                     | Yes                          | 5            | 5           | Yes (PD)                                         |
| 17      | DLBCL        | M         | 51-60             | 623                                                          | 3555                                  | 0.017                                                                                  | Yes                                  | Yes                    | 0.0866                                    | No                           | 16           | 16          | No                                               |
| 18      | PMBCL        | M         | 51-60             | 17.3                                                         | 20.0                                  | 0.224                                                                                  | No                                   | No                     | 0.182                                     | Yes                          | 1            | 1           | Yes (PD)                                         |
| 19      | DLBCL        | M         | 51-60             | 15.8                                                         | 32.5                                  | 0.124                                                                                  | No                                   | No                     | 0.126                                     | Yes                          | 11           | 16          | Yes (PD)                                         |

**Abbreviations:** ASCT: autologous stem cell transplantation; C<sub>max</sub>: maximum concentration; DLBCL: Diffuse large B cell lymphoma; F: female; M: male; OS: overall survival; PD: progressive disease; PFS: progression-free survival; Pat: patient; PMBCL: primary mediastinal B-cell lymphoma; TFL: transformed follicular lymphoma.

\*Clinical composite score<sub>TN</sub>: Maximum naïve CAR-T cell concentrations/Baseline metabolic tumour volume

†Patients who were lost to follow-up were from overseas or other US states and did not return to MD Anderson Cancer Center for further monitoring.

Table S2. Observed and predicted CAR-T cell kinetic parameters in the reference population and the low expansion subpopulation.

| Pharmacokinetic parameter                                                                                                           | Reference population (n = 15)       | Low expansion subpopulation (n = 4)      |
|-------------------------------------------------------------------------------------------------------------------------------------|-------------------------------------|------------------------------------------|
| <b>Observed CAR-T cell kinetic parameters in the reference population and the low-expansion subpopulation</b>                       |                                     |                                          |
| Maximum CAR-T cell concentration (C <sub>max</sub> ) [cells·μL <sup>-1</sup> ]                                                      | Median: 15.8<br>Range: 1.02–90.8    | Median: 8.64<br>Range: 0.64–623          |
| Area under the concentration-time curve from day 0 to day 28 (AUC <sub>0-28d</sub> ) [(cells·μL <sup>-1</sup> )·day <sup>-1</sup> ] | Median: 162<br>Range: 6.48–1195     | Median: 102<br>Range: 4.34–7068          |
| Time at maximum CAR-T cell concentration (T <sub>max</sub> ) [day]                                                                  | Median: 14<br>Range: 7–28           | Median: 17.5<br>Range: 7–28              |
| C <sub>max</sub> /Baseline metabolic tumour volume [(cells·μL <sup>-1</sup> )·mL <sup>-1</sup> ]                                    | Median: 0.386<br>Range: 0.0143–4.38 | Median: 0.0101<br>Range: 0.00242–0.175   |
| <b>Model-predicted CAR-T cell kinetic parameters in the reference population and the low-expansion subpopulation</b>                |                                     |                                          |
| Maximum CAR-T cell concentration (C <sub>max</sub> ) [cells·μL <sup>-1</sup> ]                                                      | Median: 13.8<br>Range: 1.05–79.9    | Median: 5.231<br>Range: 0.619–166        |
| Area under the concentration-time curve from day 0 to day 28 (AUC <sub>0-28d</sub> ) [(cells·μL <sup>-1</sup> )·day <sup>-1</sup> ] | Median: 179<br>Range: 11.3–1271     | Median: 94.0<br>Range: 6.41–2765         |
| Time at maximum CAR-T cell concentration (T <sub>max</sub> ) [day]                                                                  | Median: 12<br>Range: 7–28           | Median: 23.5<br>Range: 14–30             |
| C <sub>max</sub> /Baseline metabolic tumour volume [(cells·μL <sup>-1</sup> )·mL <sup>-1</sup> ]                                    | Median: 0.121<br>Range: 0.0136–3.59 | Median: 0.00594<br>Range: 0.00234–0.0467 |
